# Supplementary figures and images for: T-ALL Cells as Tool Cells for CAR T Therapy
Source: MDPI journal article supplement (doi:10.3390/vaccines11040854), 2023-04-17

Figure S1: “Fratricide” is not triggered at Non T-ALL cells.

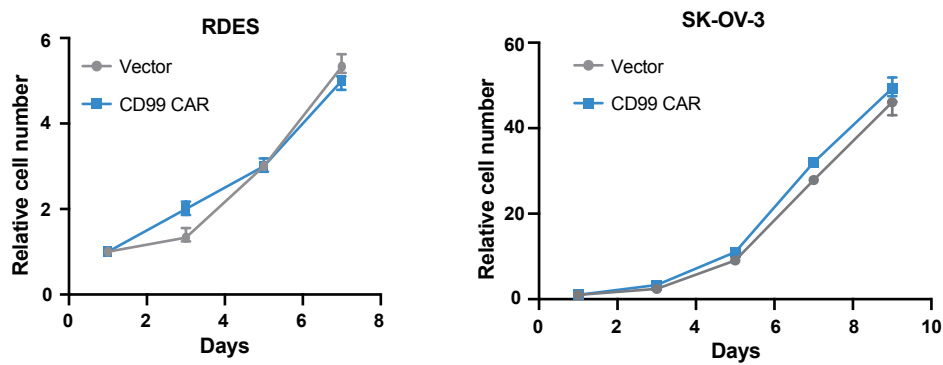

Supplement: s1 [file s1]
